# Supplementary material for: Effect of rovatirelin in patients with cerebellar ataxia: two randomised double-blind placebo-controlled phase 3 trials
Source: PubMed Central journal article supplement — J Neurol Neurosurg Psychiatry. 2020 Jan 14;91(3):254–62. doi: 10.1136/jnnp-2019-322168 (PMC7035688; doi:10.1136/jnnp-2019-322168), 2020-01-14
Supplement: jnnp-2019-322168supp001.pdf [file jnnp-2019-322168supp001.pdf]

## Effect of rovatirelin in patients with cerebellar ataxia: two randomised double-blind placebo-controlled phase 3 trials

### SUPPLEMENTARY MATERIALS

#### Supplementary table 1 Baseline characteristics of the KPS1301 study subgroup\*

full analysis set

|                          | Placebo<br>(N=44) | Rovatirelin 2.4 mg<br>(N=46) |
|--------------------------|-------------------|------------------------------|
| Age, years               | 63.2 ± 11.4       | 65.2 ± 9.5                   |
| Sex, n (%)               |                   |                              |
| Male                     | 28 (63.6)         | 24 (52.2)                    |
| Female                   | 16 (36.4)         | 22 (47.8)                    |
| Disease duration, years  | 11.9 ± 6.3        | 13.6 ± 8.8                   |
| Type of SCA, n (%)       |                   |                              |
| SCA6                     | 22 (50.0)         | 20 (43.5)                    |
| SCA31                    | 8 (18.2)          | 7 (15.2)                     |
| CCA                      | 14 (31.8)         | 19 (41.3)                    |
| SARA total score, points | 16.80 ± 2.94      | 16.93 ± 4.49                 |
| <15, n (%)               | 11 (25.0)         | 14 (30.4)                    |
| ≥15, n (%)               | 33 (75.0)         | 32 (69.6)                    |

Data are presented as mean ± SD unless stated otherwise.

\*KPS1301 subgroup included patients who met KPS1305 inclusion criteria (SARA gait score of 2–6; stance score of ≥2; finger chase, nose-finger test, and fast alternating hand movement scores of ≥1 each)

CCA, cortical cerebellar atrophy; SARA, Scale for Assessment and Rating of Ataxia; SCA, spinocerebellar ataxia; SD, standard deviation

**Supplementary table 2** Endocrinology test results in the KPS1301 study

## (A) Thyroid stimulating hormone, mIU/L

|                     | <b>Placebo<br/>(N=123)</b> | <b>Rovatiirelin 1.6 mg<br/>(N=125)</b> | <b>Rovatiirelin 2.4 mg<br/>(N=126)</b> |
|---------------------|----------------------------|----------------------------------------|----------------------------------------|
| Week -4, n          | 123                        | 125                                    | 126                                    |
| Mean $\pm$ SD       | 2.79 $\pm$ 2.78            | 3.14 $\pm$ 3.25                        | 4.40 $\pm$ 9.52                        |
| Median (range)      | 2.05 (0.14–20.40)          | 2.22 (0.15–19.80)                      | 2.44 (0.01–100.00)                     |
| Week 0, n           | 123                        | 125                                    | 126                                    |
| Mean $\pm$ SD       | 2.18 $\pm$ 1.67            | 2.66 $\pm$ 3.37                        | 3.73 $\pm$ 8.63                        |
| Median (range)      | 1.71 (0.08–11.10)          | 1.99 (0.12–35.90)                      | 1.99 (0.01–71.00)                      |
| Week 4, n           | 123                        | 124                                    | 124                                    |
| Mean $\pm$ SD       | 2.28 $\pm$ 1.62            | 6.01 $\pm$ 9.69                        | 7.08 $\pm$ 11.21                       |
| Median (range)      | 1.87 (0.12–9.68)           | 3.70 (0.48–100.00)                     | 4.17 (0.01–79.40)                      |
| Week 8, n           | 122                        | 120                                    | 117                                    |
| Mean $\pm$ SD       | 2.21 $\pm$ 1.50            | 5.79 $\pm$ 9.81                        | 6.82 $\pm$ 11.52                       |
| Median (range)      | 1.83 (0.40–9.29)           | 3.65 (0.26–100.00)                     | 4.42 (0.10–100.00)                     |
| Week 12, n          | 122                        | 118                                    | 112                                    |
| Mean $\pm$ SD       | 2.06 $\pm$ 1.14            | 5.79 $\pm$ 10.12                       | 6.86 $\pm$ 12.34                       |
| Median (range)      | 1.74 (0.39–6.44)           | 3.42 (0.62–100.00)                     | 3.85 (0.07–100.00)                     |
| Week 16, n          | 120                        | 116                                    | 108                                    |
| Mean $\pm$ SD       | 2.08 $\pm$ 1.41            | 5.41 $\pm$ 9.62                        | 6.16 $\pm$ 10.58                       |
| Median (range)      | 1.70 (0.29–9.06)           | 3.51 (0.38–100.00)                     | 3.99 (0.23–100.00)                     |
| Week 20, n          | 120                        | 113                                    | 106                                    |
| Mean $\pm$ SD       | 2.11 $\pm$ 1.45            | 5.50 $\pm$ 8.55                        | 5.94 $\pm$ 9.48                        |
| Median (range)      | 1.80 (0.30–11.10)          | 3.67 (0.57–86.20)                      | 3.68 (0.41–84.70)                      |
| Week 24, n          | 119                        | 106                                    | 103                                    |
| Mean $\pm$ SD       | 2.07 $\pm$ 1.39            | 4.57 $\pm$ 4.45                        | 6.05 $\pm$ 10.77                       |
| Median (range)      | 1.79 (0.40–11.60)          | 3.49 (0.48–36.10)                      | 3.70 (0.41–100.00)                     |
| Week 28, n          | 118                        | 105                                    | 102                                    |
| Mean $\pm$ SD       | 2.13 $\pm$ 1.78            | 4.67 $\pm$ 3.40                        | 6.01 $\pm$ 9.92                        |
| Median (range)      | 1.73 (0.05–13.80)          | 3.46 (0.64–15.60)                      | 4.06 (0.11–95.80)                      |
| Final evaluation, n | 123                        | 124                                    | 125                                    |
| Mean $\pm$ SD       | 2.12 $\pm$ 1.75            | 5.71 $\pm$ 8.59                        | 5.68 $\pm$ 9.11                        |
| Median (range)      | 1.73 (0.05–13.80)          | 3.54 (0.42–86.20)                      | 3.90 (0.11–95.80)                      |
| Follow-up visit, n  | 15                         | 24                                     | 28                                     |
| Mean $\pm$ SD       | 2.52 $\pm$ 1.89            | 7.54 $\pm$ 19.85                       | 3.50 $\pm$ 5.15                        |
| Median (range)      | 1.73 (0.01–5.92)           | 2.89 (0.07–100.00)                     | 1.93 (0.24–26.50)                      |

SD, standard deviation

## (B) Free triiodothyronine, ng/L

|                     | Placebo<br>(N=123) | Rovatirolin 1.6 mg<br>(N=125) | Rovatirolin 2.4 mg<br>(N=126) |
|---------------------|--------------------|-------------------------------|-------------------------------|
| Week -4, n          | 123                | 125                           | 126                           |
| Mean ± SD           | 3.21 ± 0.40        | 3.25 ± 0.51                   | 3.24 ± 0.48                   |
| Median (range)      | 3.21 (2.46–4.05)   | 3.22 (2.02–5.88)              | 3.17 (2.06–5.49)              |
| Week 0, n           | 123                | 125                           | 126                           |
| Mean ± SD           | 2.88 ± 0.34        | 2.87 ± 0.39                   | 2.85 ± 0.35                   |
| Median (range)      | 2.86 (2.27–3.66)   | 2.84 (2.11–3.98)              | 2.81 (1.88–4.54)              |
| Week 4, n           | 123                | 124                           | 124                           |
| Mean ± SD           | 2.95 ± 0.32        | 4.02 ± 0.69                   | 4.21 ± 0.70                   |
| Median (range)      | 2.99 (2.27–3.80)   | 3.96 (2.17–6.32)              | 4.19 (2.34–6.50)              |
| Week 8, n           | 122                | 120                           | 117                           |
| Mean ± SD           | 2.94 ± 0.35        | 4.02 ± 0.68                   | 4.10 ± 0.70                   |
| Median (range)      | 2.95 (2.23–3.85)   | 3.94 (2.33–6.33)              | 4.02 (2.75–7.54)              |
| Week 12, n          | 122                | 118                           | 112                           |
| Mean ± SD           | 2.88 ± 0.35        | 3.90 ± 0.66                   | 4.01 ± 0.62                   |
| Median (range)      | 2.88 (2.12–3.77)   | 3.86 (2.41–6.30)              | 3.92 (2.84–6.12)              |
| Week 16, n          | 120                | 116                           | 108                           |
| Mean ± SD           | 2.87 ± 0.36        | 3.87 ± 0.65                   | 3.95 ± 0.72                   |
| Median (range)      | 2.84 (1.85–3.88)   | 3.8 (2.49–5.95)               | 3.82 (2.30–6.65)              |
| Week 20, n          | 120                | 113                           | 106                           |
| Mean ± SD           | 2.93 ± 0.38        | 3.93 ± 0.57                   | 3.97 ± 0.61                   |
| Median (range)      | 2.9 (2.19–4.26)    | 3.93 (2.56–6.21)              | 3.90 (2.60–5.83)              |
| Week 24, n          | 119                | 106                           | 103                           |
| Mean ± SD           | 2.97 ± 0.37        | 4.00 ± 0.62                   | 4.02 ± 0.67                   |
| Median (range)      | 2.96 (2.12–3.96)   | 3.94 (2.47–5.84)              | 3.93 (2.59–5.69)              |
| Week 28, n          | 118                | 105                           | 102                           |
| Mean ± SD           | 2.97 ± 0.42        | 4.01 ± 0.66                   | 4.01 ± 0.74                   |
| Median (range)      | 2.94 (2.23–5.18)   | 3.95 (2.46–7.42)              | 3.89 (2.47–7.41)              |
| Final evaluation, n | 123                | 124                           | 125                           |
| Mean ± SD           | 2.96 ± 0.42        | 3.99 ± 0.68                   | 4.02 ± 0.77                   |
| Median (range)      | 2.93 (2.23–5.18)   | 3.95 (2.46–7.42)              | 3.9 (2.34–7.41)               |
| Follow-up visit, n  | 15                 | 24                            | 28                            |
| Mean ± SD           | 3.58 ± 1.48        | 2.97 ± 0.54                   | 3.08 ± 0.50                   |
| Median (range)      | 3.30 (2.46–8.76)   | 3.00 (1.62–4.1)               | 2.98 (2.15–4.38)              |

SD, standard deviation

## (C) Free thyroxine, ng/dL

|                     | Placebo<br>(N=123) | Rovatiirelin 1.6 mg<br>(N=125) | Rovatiirelin 2.4 mg<br>(N=126) |
|---------------------|--------------------|--------------------------------|--------------------------------|
| Week -4, n          | 123                | 125                            | 126                            |
| Mean ± SD           | 1.36 ± 0.20        | 1.39 ± 0.20                    | 1.34 ± 0.23                    |
| Median (range)      | 1.34 (0.91–1.92)   | 1.37 (0.97–1.93)               | 1.35 (0.73–2.26)               |
| Week 0, n           | 123                | 125                            | 126                            |
| Mean ± SD           | 1.19 ± 0.18        | 1.22 ± 0.18                    | 1.18 ± 0.21                    |
| Median (range)      | 1.17 (0.80–1.81)   | 1.20 (0.80–1.79)               | 1.17 (0.54–1.85)               |
| Week 4, n           | 123                | 124                            | 124                            |
| Mean ± SD           | 1.26 ± 0.20        | 1.75 ± 0.28                    | 1.80 ± 0.34                    |
| Median (range)      | 1.26 (0.83–2.14)   | 1.76 (0.77–2.57)               | 1.80 (0.69–2.78)               |
| Week 8, n           | 122                | 120                            | 117                            |
| Mean ± SD           | 1.28 ± 0.17        | 1.77 ± 0.28                    | 1.77 ± 0.30                    |
| Median (range)      | 1.27 (0.88–1.76)   | 1.76 (0.70–2.52)               | 1.74 (1.00–2.75)               |
| Week 12, n          | 122                | 118                            | 112                            |
| Mean ± SD           | 1.26 ± 0.17        | 1.74 ± 0.27                    | 1.75 ± 0.29                    |
| Median (range)      | 1.27 (0.86–1.81)   | 1.72 (0.80–2.49)               | 1.71 (0.92–2.76)               |
| Week 16, n          | 120                | 116                            | 108                            |
| Mean ± SD           | 1.27 ± 0.18        | 1.73 ± 0.26                    | 1.75 ± 0.31                    |
| Median (range)      | 1.27 (0.93–1.86)   | 1.77 (0.88–2.31)               | 1.74 (0.95–2.67)               |
| Week 20, n          | 120                | 113                            | 106                            |
| Mean ± SD           | 1.29 ± 0.18        | 1.77 ± 0.25                    | 1.78 ± 0.30                    |
| Median (range)      | 1.28 (0.92–1.87)   | 1.80 (0.84–2.32)               | 1.80 (0.79–2.47)               |
| Week 24, n          | 119                | 106                            | 103                            |
| Mean ± SD           | 1.33 ± 0.18        | 1.80 ± 0.27                    | 1.81 ± 0.29                    |
| Median (range)      | 1.31 (0.95–1.78)   | 1.83 (1.10–2.47)               | 1.79 (0.76–2.53)               |
| Week 28, n          | 118                | 105                            | 102                            |
| Mean ± SD           | 1.30 ± 0.19        | 1.77 ± 0.24                    | 1.76 ± 0.27                    |
| Median (range)      | 1.29 (0.96–2.30)   | 1.78 (1.12–2.29)               | 1.73 (1.09–2.45)               |
| Final evaluation, n | 123                | 124                            | 125                            |
| Mean ± SD           | 1.30 ± 0.19        | 1.75 ± 0.26                    | 1.77 ± 0.30                    |
| Median (range)      | 1.28 (0.96–2.30)   | 1.76 (0.84–2.29)               | 1.76 (0.98–2.67)               |
| Follow-up visit, n  | 15                 | 24                             | 28                             |
| Mean ± SD           | 1.60 ± 0.66        | 1.31 ± 0.24                    | 1.32 ± 0.31                    |
| Median (range)      | 1.49 (1.06–3.84)   | 1.29 (0.72–1.78)               | 1.28 (0.86–1.99)               |

SD, standard deviation

(D) Prolactin in men,  $\mu\text{g/L}$ 

|                     | Placebo<br>(N=67) | Rovatrelin 1.6 mg<br>(N=64) | Rovatrelin 2.4 mg<br>(N=65) |
|---------------------|-------------------|-----------------------------|-----------------------------|
| Week -4, n          | 67                | 64                          | 65                          |
| Mean $\pm$ SD       | 8.90 $\pm$ 3.32   | 11.76 $\pm$ 8.66            | 29.40 $\pm$ 161.90          |
| Median (range)      | 8.46 (3.32–16.42) | 9.97 (2.84–63.32)           | 7.97 (3.10–1313.00)         |
| Week 0, n           | 67                | 64                          | 65                          |
| Mean $\pm$ SD       | 8.80 $\pm$ 3.82   | 9.25 $\pm$ 4.04             | 29.81 $\pm$ 166.14          |
| Median (range)      | 8.00 (3.28–23.01) | 8.37 (3.82–27.19)           | 7.59 (3.58–1347.00)         |
| Week 4, n           | 67                | 64                          | 64                          |
| Mean $\pm$ SD       | 8.45 $\pm$ 4.08   | 20.00 $\pm$ 8.58            | 35.43 $\pm$ 144.87          |
| Median (range)      | 7.52 (2.69–29.59) | 18.10 (4.61–52.42)          | 14.95 (7.44–1174.00)        |
| Week 8, n           | 66                | 60                          | 61                          |
| Mean $\pm$ SD       | 8.43 $\pm$ 3.19   | 20.56 $\pm$ 11.56           | 36.60 $\pm$ 145.54          |
| Median (range)      | 7.96 (3.20–23.14) | 18.94 (3.60–86.46)          | 16.69 (3.93–1152.00)        |
| Week 12, n          | 67                | 60                          | 59                          |
| Mean $\pm$ SD       | 8.61 $\pm$ 4.17   | 21.99 $\pm$ 12.96           | 35.80 $\pm$ 135.69          |
| Median (range)      | 7.57 (4.12–28.81) | 19.09 (7.50–98.31)          | 15.62 (3.71–1056.00)        |
| Week 16, n          | 66                | 59                          | 57                          |
| Mean $\pm$ SD       | 9.91 $\pm$ 6.00   | 22.56 $\pm$ 13.79           | 36.73 $\pm$ 140.75          |
| Median (range)      | 7.92 (3.85–34.44) | 20.74 (5.04–82.02)          | 16.96 (4.1–1078.00)         |
| Week 20, n          | 66                | 56                          | 55                          |
| Mean $\pm$ SD       | 9.15 $\pm$ 3.79   | 21.61 $\pm$ 12.60           | 36.43 $\pm$ 131.61          |
| Median (range)      | 8.24 (3.09–26.73) | 19.07 (5.88–82.64)          | 16.29 (4.30–991.20)         |
| Week 24, n          | 65                | 55                          | 53                          |
| Mean $\pm$ SD       | 9.31 $\pm$ 3.53   | 24.32 $\pm$ 23.50           | 37.1263 $\pm$ 144.47        |
| Median (range)      | 8.84 (2.95–19.55) | 18.94 (6.55–170.8)          | 15.95 (3.64–1067.00)        |
| Week 28, n          | 65                | 55                          | 53                          |
| Mean $\pm$ SD       | 8.93 $\pm$ 3.80   | 22.22 $\pm$ 15.74           | 35.36 $\pm$ 125.36          |
| Median (range)      | 8.21 (3.65–22.61) | 17.44 (6.19–102.10)         | 16.00 (5.40–928.30)         |
| Final evaluation, n | 67                | 64                          | 64                          |
| Mean $\pm$ SD       | 8.86 $\pm$ 3.77   | 21.64 $\pm$ 15.03           | 31.85 $\pm$ 114.20          |
| Median (range)      | 8.19 (3.65–22.61) | 17.4 (5.09–102.10)          | 15.91 (3.93–928.30)         |
| Follow-up visit, n  | 6                 | 12                          | 15                          |
| Mean $\pm$ SD       | 11.31 $\pm$ 10.27 | 10.14 $\pm$ 3.90            | 8.57 $\pm$ 2.93             |
| Median (range)      | 6.60 (3.56–30.14) | 11.02 (3.80–16.92)          | 7.97 (3.83–13.93)           |

SD, standard deviation

## (E) Prolactin in women, µg/L

|                     | Placebo<br>(N=56)   | Rovatiirelin 1.6 mg<br>(N=61) | Rovatiirelin 2.4 mg<br>(N=61) |
|---------------------|---------------------|-------------------------------|-------------------------------|
| Week -4, n          | 56                  | 61                            | 61                            |
| Mean ± SD           | 13.00 ± 22.78       | 13.15 ± 17.36                 | 12.10 ± 7.10                  |
| Median (range)      | 8.98 (2.83–176.30)  | 10.02 (3.95–139.90)           | 10.60 (2.76–47.03)            |
| Week 0, n           | 56                  | 61                            | 61                            |
| Mean ± SD           | 11.81 ± 21.98       | 9.27 ± 4.50                   | 8.56 ± 2.89                   |
| Median (range)      | 8.22 (3.81–171.00)  | 7.85 (4.07–28.07)             | 8.23 (3.91–15.46)             |
| Week 4, n           | 56                  | 60                            | 60                            |
| Mean ± SD           | 10.72 ± 15.44       | 24.37 ± 11.58                 | 27.41 ± 29.16                 |
| Median (range)      | 8.22 (3.13–120.60)  | 23.99 (5.96–55.61)            | 22.46 (6.54–230.70)           |
| Week 8, n           | 56                  | 60                            | 56                            |
| Mean ± SD           | 9.06 ± 8.28         | 24.41 ± 10.59                 | 28.00 ± 29.76                 |
| Median (range)      | 7.85 (3.19–64.44)   | 23.48 (6.54–51.81)            | 23.23 (7.86–230.30)           |
| Week 12, n          | 55                  | 58                            | 53                            |
| Mean ± SD           | 9.53 ± 7.69         | 24.80 ± 10.17                 | 26.85 ± 23.81                 |
| Median (range)      | 8.09 (3.79–55.08)   | 23.80 (6.77–55.55)            | 19.96 (6.82–170.70)           |
| Week 16, n          | 54                  | 57                            | 51                            |
| Mean ± SD           | 11.11 ± 22.95       | 25.27 ± 11.02                 | 25.69 ± 11.21                 |
| Median (range)      | 7.05 (2.70–174.50)  | 23.74 (7.08–55.98)            | 24.67 (6.45–71.44)            |
| Week 20, n          | 54                  | 57                            | 51                            |
| Mean ± SD           | 10.42 ± 17.95       | 24.25 ± 9.37                  | 28.31 ± 28.31                 |
| Median (range)      | 7.64 (3.50–138.40)  | 22.47 (9.02–58.32)            | 23.01 (8.11–211.30)           |
| Week 24, n          | 54                  | 51                            | 50                            |
| Mean ± SD           | 10.28 ± 11.54       | 25.20 ± 11.45                 | 24.69 ± 9.86                  |
| Median (range)      | 7.53 (2.95–73.26)   | 22.46 (10.23–58.43)           | 23.80 (9.96–58.87)            |
| Week 28, n          | 53                  | 50                            | 49                            |
| Mean ± SD           | 10.00 ± 11.58       | 23.92 ± 0.97                  | 26.40 ± 11.88                 |
| Median (range)      | 7.57 (3.98–88.04)   | 21.56 (7.15–57.86)            | 24.42 (4.22–61.26)            |
| Final evaluation, n | 56                  | 60                            | 61                            |
| Mean ± SD           | 9.80 ± 11.32        | 23.38 ± 10.96                 | 27.77 ± 26.57                 |
| Median (range)      | 7.41 (3.98–88.04)   | 21.56 (6.33–57.86)            | 24.02 (4.22–211.3)            |
| Follow-up visit, n  | 9                   | 12                            | 13                            |
| Mean ± SD           | 20.24 ± 31.86       | 13.12 ± 5.88                  | 11.70 ± 3.73                  |
| Median (range)      | 10.33 (4.82–104.40) | 12.13 (5.89–26.85)            | 10.76 (7.05–18.83)            |

SD, standard deviation

**Supplementary table 3** Endocrinology test results in the KPS1305 study

## (A) Thyroid stimulating hormone, mIU/L

|                     | Placebo (N=102)    | Rovatirolin 2.4 mg (N=101) |
|---------------------|--------------------|----------------------------|
| Week -4, n          | 102                | 101                        |
| Mean $\pm$ SD       | 4.03 $\pm$ 10.24   | 2.11 $\pm$ 1.40            |
| Median (range)      | 2.02 (0.35–100)    | 1.77 (0.19–9.86)           |
| Week 0, n           | 102                | 100                        |
| Mean $\pm$ SD       | 3.44 $\pm$ 9.91    | 1.93 $\pm$ 1.20            |
| Median (range)      | 1.90 (0.24–100.00) | 1.66 (0.07–6.64)           |
| Week 4, n           | 101                | 99                         |
| Mean $\pm$ SD       | 2.77 $\pm$ 3.87    | 4.13 $\pm$ 2.68            |
| Median (range)      | 1.84 (0.26–31.40)  | 4.02 (0.09–12.60)          |
| Week 8, n           | 99                 | 95                         |
| Mean $\pm$ SD       | 3.43 $\pm$ 8.27    | 4.26 $\pm$ 3.06            |
| Median (range)      | 1.95 (0.36–79.30)  | 3.53 (0.18–17.30)          |
| Week 12, n          | 95                 | 94                         |
| Mean $\pm$ SD       | 3.38 $\pm$ 10.18   | 4.18 $\pm$ 2.60            |
| Median (range)      | 1.95 (0.34–100.00) | 3.78 (0.45–10.80)          |
| Week 16, n          | 91                 | 94                         |
| Mean $\pm$ SD       | 3.09 $\pm$ 7.95    | 3.67 $\pm$ 2.66            |
| Median (range)      | 1.84 (0.20–76.20)  | 3.06 (0.32–13.80)          |
| Week 20, n          | 90                 | 93                         |
| Mean $\pm$ SD       | 2.75 $\pm$ 5.07    | 4.11 $\pm$ 3.27            |
| Median (range)      | 1.78 (0.32–48.10)  | 3.27 (0.13–17.60)          |
| Week 24, n          | 90                 | 91                         |
| Mean $\pm$ SD       | 3.37 $\pm$ 10.40   | 4.07 $\pm$ 2.84            |
| Median (range)      | 1.86 (0.30–100.00) | 3.21 (0.32–14.30)          |
| Final evaluation, n | 101                | 101                        |
| Mean $\pm$ SD       | 3.32 $\pm$ 9.85    | 3.95 $\pm$ 2.88            |
| Median (range)      | 1.95 (0.30–100.00) | 3.13 (0.09–14.30)          |
| Follow-up visit, n  | 100                | 100                        |
| Mean $\pm$ SD       | 3.82 $\pm$ 9.94    | 2.21 $\pm$ 1.36            |
| Median (range)      | 2.14 (0.24–100.00) | 1.89 (0.04–8.21)           |

SD, standard deviation

## (B) Free triiodothyronine, ng/L

|                     | Placebo (N=102)  | Rovatiirelin 2.4 mg (N=101) |
|---------------------|------------------|-----------------------------|
| Week -4, n          | 102              | 101                         |
| Mean $\pm$ SD       | 3.10 $\pm$ 0.47  | 3.24 $\pm$ 0.43             |
| Median (range)      | 3.10 (1.96–4.94) | 3.22 (2.25–4.40)            |
| Week 0, n           | 102              | 100                         |
| Mean $\pm$ SD       | 2.78 $\pm$ 0.34  | 2.86 $\pm$ 0.35             |
| Median (range)      | 2.74 (1.56–3.75) | 2.85 (1.91–4.02)            |
| Week 4, n           | 101              | 99                          |
| Mean $\pm$ SD       | 2.87 $\pm$ 0.33  | 4.40 $\pm$ 0.77             |
| Median (range)      | 2.85 (2.14–3.67) | 4.32 (2.90–7.17)            |
| Week 8, n           | 99               | 95                          |
| Mean $\pm$ SD       | 2.85 $\pm$ 0.33  | 4.28 $\pm$ 0.68             |
| Median (range)      | 2.82 (1.97–3.68) | 4.20 (3.00–7.19)            |
| Week 12, n          | 95               | 94                          |
| Mean $\pm$ SD       | 2.90 $\pm$ 0.34  | 4.40 $\pm$ 0.82             |
| Median (range)      | 2.86 (2.00–3.68) | 4.33 (2.63–7.30)            |
| Week 16, n          | 91               | 94                          |
| Mean $\pm$ SD       | 2.95 $\pm$ 0.33  | 4.26 $\pm$ 0.70             |
| Median (range)      | 2.97 (2.25–3.92) | 4.27 (2.69–6.22)            |
| Week 20, n          | 90               | 93                          |
| Mean $\pm$ SD       | 3.01 $\pm$ 0.35  | 4.26 $\pm$ 0.61             |
| Median (range)      | 3.00 (2.25–3.82) | 4.20 (3.13–6.11)            |
| Week 24, n          | 90               | 91                          |
| Mean $\pm$ SD       | 3.00 $\pm$ 0.35  | 4.24 $\pm$ 0.85             |
| Median (range)      | 2.99 (2.07–3.79) | 4.16 (2.29–7.11)            |
| Final evaluation, n | 101              | 101                         |
| Mean $\pm$ SD       | 2.99 $\pm$ 0.36  | 4.22 $\pm$ 0.88             |
| Median (range)      | 2.97 (2.07–3.79) | 4.07 (2.29–7.17)            |
| Follow-up visit, n  | 100              | 100                         |
| Mean $\pm$ SD       | 3.28 $\pm$ 0.52  | 3.13 $\pm$ 0.44             |
| Median (range)      | 3.33 (2.04–4.76) | 3.07 (2.11–4.26)            |

SD, standard deviation



## (C) Free thyroxine, ng/dL

|                     | Placebo (N=102)  | Rovatiirelin 2.4 mg (N=101) |
|---------------------|------------------|-----------------------------|
| Week -4, n          | 102              | 101                         |
| Mean $\pm$ SD       | 1.34 $\pm$ 0.20  | 1.37 $\pm$ 0.18             |
| Median (range)      | 1.36 (0.40–1.87) | 1.37 (0.93–1.90)            |
| Week 0, n           | 102              | 100                         |
| Mean $\pm$ SD       | 1.19 $\pm$ 0.19  | 1.19 $\pm$ 0.16             |
| Median (range)      | 1.19 (0.32–1.72) | 1.19 (0.88–1.57)            |
| Week 4, n           | 101              | 99                          |
| Mean $\pm$ SD       | 1.25 $\pm$ 0.17  | 1.89 $\pm$ 0.28             |
| Median (range)      | 1.24 (0.75–1.79) | 1.87 (1.31–3.28)            |
| Week 8, n           | 99               | 95                          |
| Mean $\pm$ SD       | 1.25 $\pm$ 0.17  | 1.81 $\pm$ 0.24             |
| Median (range)      | 1.24 (0.67–1.78) | 1.81 (1.21–2.48)            |
| Week 12, n          | 95               | 94                          |
| Mean $\pm$ SD       | 1.26 $\pm$ 0.18  | 1.84 $\pm$ 0.29             |
| Median (range)      | 1.27 (0.61–1.73) | 1.82 (1.20–2.59)            |
| Week 16, n          | 91               | 94                          |
| Mean $\pm$ SD       | 1.29 $\pm$ 0.19  | 1.82 $\pm$ 0.22             |
| Median (range)      | 1.29 (0.74–1.82) | 1.81 (1.33–2.29)            |
| Week 20, n          | 90               | 93                          |
| Mean $\pm$ SD       | 1.31 $\pm$ 0.17  | 1.78 $\pm$ 0.25             |
| Median (range)      | 1.29 (0.88–1.77) | 1.77 (1.18–2.43)            |
| Week 24, n          | 90               | 91                          |
| Mean $\pm$ SD       | 1.29 $\pm$ 0.17  | 1.74 $\pm$ 0.28             |
| Median (range)      | 1.30 (0.68–1.77) | 1.67 (1.12–2.78)            |
| Final evaluation, n | 101              | 101                         |
| Mean $\pm$ SD       | 1.29 $\pm$ 0.17  | 1.76 $\pm$ 0.31             |
| Median (range)      | 1.29 (0.68–1.77) | 1.67 (1.12–3.28)            |
| Follow-up visit, n  | 100              | 100                         |
| Mean $\pm$ SD       | 1.42 $\pm$ 0.20  | 1.30 $\pm$ 0.21             |
| Median (range)      | 1.44 (0.61–1.83) | 1.28 (0.76–1.92)            |

SD, standard deviation

(D) Prolactin in men,  $\mu\text{g/L}$ 

|                     | Placebo (N=50)     | Rovatinirelin 2.4 mg (N=57) |
|---------------------|--------------------|-----------------------------|
| Week -4, n          | 50                 | 57                          |
| Mean $\pm$ SD       | 11.70 $\pm$ 6.61   | 9.54 $\pm$ 3.56             |
| Median (range)      | 10.03 (4.76–41.74) | 9.22 (2.61–20.09)           |
| Week 0, n           | 50                 | 57                          |
| Mean $\pm$ SD       | 10.97 $\pm$ 7.75   | 9.61 $\pm$ 4.34             |
| Median (range)      | 9.04 (4.53–58.04)  | 8.38 (4.18–31.53)           |
| Week 4, n           | 49                 | 55                          |
| Mean $\pm$ SD       | 9.53 $\pm$ 3.88    | 21.12 $\pm$ 12.93           |
| Median (range)      | 8.89 (3.86–24.13)  | 19.10 (7.77–93.53)          |
| Week 8, n           | 48                 | 52                          |
| Mean $\pm$ SD       | 11.30 $\pm$ 11.37  | 19.15 $\pm$ 8.36            |
| Median (range)      | 4.70 (9.06–84.20)  | 5.92 (17.19–52.87)          |
| Week 12, n          | 46                 | 52                          |
| Mean $\pm$ SD       | 10.89 $\pm$ 6.79   | 18.86 $\pm$ 7.96            |
| Median (range)      | 9.27 (4.23–48.77)  | 17.83 (5.21–47.06)          |
| Week 16, n          | 45                 | 52                          |
| Mean $\pm$ SD       | 10.07 $\pm$ 6.37   | 18.79 $\pm$ 6.76            |
| Median (range)      | 8.83 (3.90–46.61)  | 17.93 (6.35–39.14)          |
| Week 20, n          | 45                 | 51                          |
| Mean $\pm$ SD       | 11.14 $\pm$ 7.83   | 17.25 $\pm$ 6.96            |
| Median (range)      | 3.51 (9.12–55.35)  | 5.80 (14.69–34.08)          |
| Week 24, n          | 45                 | 51                          |
| Mean $\pm$ SD       | 10.77 $\pm$ 6.13   | 19.23 $\pm$ 7.97            |
| Median (range)      | 9.45 (3.40–43.89)  | 16.7 (5.73–44.30)           |
| Final evaluation, n | 49                 | 57                          |
| Mean $\pm$ SD       | 10.92 $\pm$ 6.13   | 18.87 $\pm$ 7.97            |
| Median (range)      | 9.45 (3.40–43.89)  | 2.90 (16.70–44.30)          |
| Follow-up visit, n  | 49                 | 56                          |
| Mean $\pm$ SD       | 13.00 $\pm$ 8.71   | 10.40 $\pm$ 3.74            |
| Median (range)      | 11.56 (3.99–59.36) | 9.95 (4.12–26.74)           |

SD, standard deviation

## (E) Prolactin in women, µg/L

|                     | Placebo (N=52)     | Rovatiselin 2.4 mg (N=44) |
|---------------------|--------------------|---------------------------|
| Week -4, n          | 52                 | 44                        |
| Mean ± SD           | 12.23 ± 5.48       | 11.42 ± 5.29              |
| Median (range)      | 10.53 (5.13–30.20) | 10.60 (3.34–30.61)        |
| Week 0, n           | 52                 | 43                        |
| Mean ± SD           | 9.96 ± 4.19        | 10.95 ± 4.43              |
| Median (range)      | 8.69 (4.14–25.19)  | 9.67 (3.80–23.48)         |
| Week 4, n           | 52                 | 44                        |
| Mean ± SD           | 10.84 ± 4.52       | 25.33 ± 12.30             |
| Median (range)      | 10.21 (5.35–26.14) | 23.67 (6.67–74.82)        |
| Week 8, n           | 51                 | 43                        |
| Mean ± SD           | 10.85 ± 6.10       | 27.86 ± 15.85             |
| Median (range)      | 9.17 (3.50–37.48)  | 24.67 (8.26–80.89)        |
| Week 12, n          | 49                 | 42                        |
| Mean ± SD           | 10.86 ± 6.34       | 25.68 ± 13.23             |
| Median (range)      | 9.67 (5.35–47.74)  | 25.42 (8.76–73.05)        |
| Week 16, n          | 46                 | 42                        |
| Mean ± SD           | 9.65 ± 3.11        | 25.93 ± 15.19             |
| Median (range)      | 9.69 (4.82–17.32)  | 22.69 (6.76–86.05)        |
| Week 20, n          | 45                 | 42                        |
| Mean ± SD           | 9.90 ± 3.80        | 24.72 ± 10.85             |
| Median (range)      | 9.43 (4.11–17.51)  | 25.00 (7.92–54.38)        |
| Week 24, n          | 45                 | 40                        |
| Mean ± SD           | 10.18 ± 3.95       | 25.15 ± 12.73             |
| Median (range)      | 9.76 (5.29–24.83)  | 23.63 (6.79–67.26)        |
| Final evaluation, n | 52                 | 44                        |
| Mean ± SD           | 10.76 ± 6.56       | 25.06 ± 12.22             |
| Median (range)      | 9.73 (4.75–47.74)  | 23.74 (6.79–67.26)        |
| Follow-up visit, n  | 51                 | 44                        |
| Mean ± SD           | 12.90 ± 7.07       | 12.61 ± 6.28              |
| Median (range)      | 10.21 (5.38–41.58) | 11.25 (3.27–26.78)        |

SD, standard deviation

**Supplementary figure 1** Diagnosis flow of CCA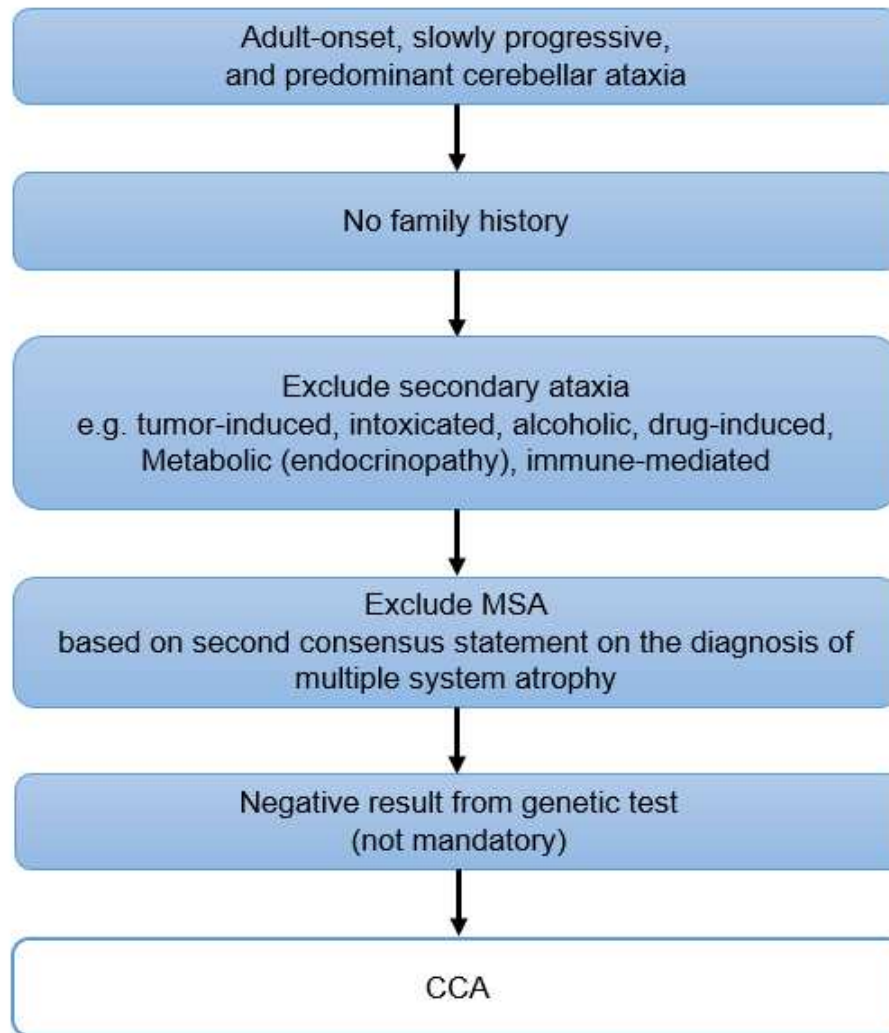

**Supplementary figure 2** Subgroup analysis with various background factors in pooled patient group, KPS1301 Subgroup (excluding 1.6 mg) and KPS1305 (excluding patient who had previously participated in a rovatirelin clinical study)

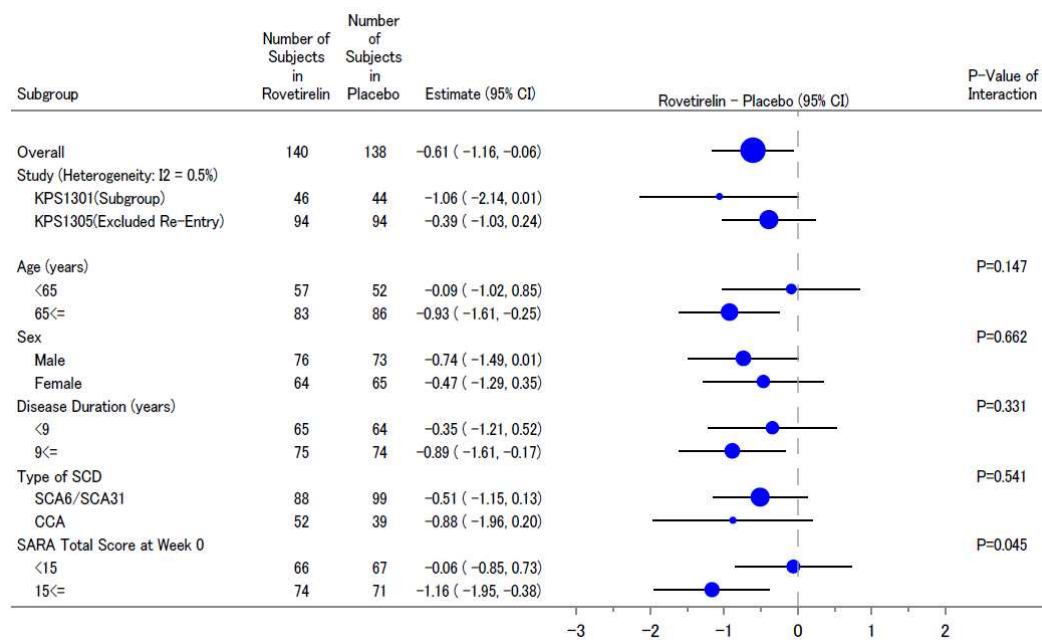

I<sup>2</sup> is measure of heterogeneity across the studies, ranging from 0–100%. A value of 0% indicates no heterogeneity, and larger values show increasing heterogeneity.

P-value of Interaction is an interaction test used for assessing the heterogeneity of the between-group difference across subgroups within the same factor.
